# Supplementary material for: Effects of Pyruvate Kinase M2 (PKM2) Gene Deletion on Astrocyte-Specific Glycolysis and Global Cerebral Ischemia-Induced Neuronal Death
Source: MDPI journal article supplement (doi:10.3390/antiox12020491), 2023-02-15
Supplement: s1 [file s1]

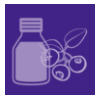

## Supplementary Materials

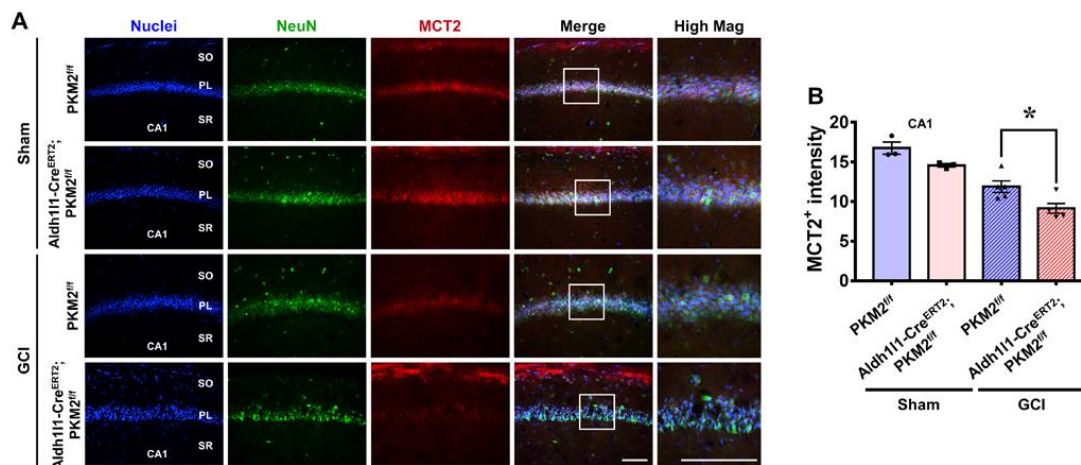

**Figure S1.** (A) the fluorescent image shows merge of monocarboxylate transporter 2 (MCT2, red), NeuN (living neurons, green) and DAPI (blue). (B) When averaged in the graph, there was no difference in the sham groups. However, MCT2 intensity significantly decreased with PKM2 gene deletion groups in GCI groups. (Sham-PKM2<sup>fl/fl</sup> group, n = 3; Sham-Aldh1l1-Cre<sup>ERT2</sup>; PKM2<sup>fl/fl</sup>, n = 3; GCI-PKM2<sup>fl/fl</sup> group, n = 5, GCI-Aldh1l1-Cre<sup>ERT2</sup>; PKM2<sup>fl/fl</sup>, n = 5). Scale bar = 100  $\mu$ m. Data are shown as mean  $\pm$  SEM (Kruskal–Wallis test followed by Bonferroni post-hoc test, MCT2: chi square = 12.765, df = 3, p = 0.005) \*Significantly different from the GCI-PKM2<sup>fl/fl</sup> group, Aldh1l1-Cre<sup>ERT2</sup>; PKM2<sup>fl/fl</sup> group, p < 0.05.

**Table S1.** Criteria of the Neurological Severity Score (NSS) in mice.

| Task                                    | Measurement                          | Point |
|-----------------------------------------|--------------------------------------|-------|
| 1. Motor dysfunction                    |                                      |       |
| Present of mono- or hemiparesis         | Absent                               | 0     |
|                                         | Present                              | 1     |
| 2. Body coordination                    | (Unstable or drop: 1p, Criteria: 0p) |       |
| Walk on a 3cm wide beam                 | Score                                | 0-1   |
| Walk on a 2cm wide beam                 | Score                                | 0-1   |
| Walk on a 1cm wide beam                 | Score                                | 0-1   |
| 3. Body balance                         | (Unstable or drop: 1p, Criteria: 0p) |       |
| Balance on a 1cm wide beam              | Score                                | 0-1   |
| Balance on a 0.5cm diameter round stick | Score                                | 0-1   |
| 4. Escape from 30cm diameter circle     |                                      |       |
|                                         | Escape                               | 0     |
|                                         | > 2min                               | 1     |
| 5. General behavioral deficit           |                                      |       |
| Seeking behavior                        | Present                              | 0     |
|                                         | Absent                               | 1     |
| Walk straight line                      | Present                              | 0     |
|                                         | Absent                               | 1     |
| 6. Startle reflex                       | Present                              | 0     |
|                                         | Absent                               | 1     |
| Total behavior score                    |                                      | 10    |
